# Supplementary material for: Biological Pathways Leading From ANGPTL8 to Diabetes Mellitus–A Co-expression Network Based Analysis
Source: PubMed Central journal article supplement (PMC6309236; doi:10.3389/fphys.2018.01841), 2018-12-21

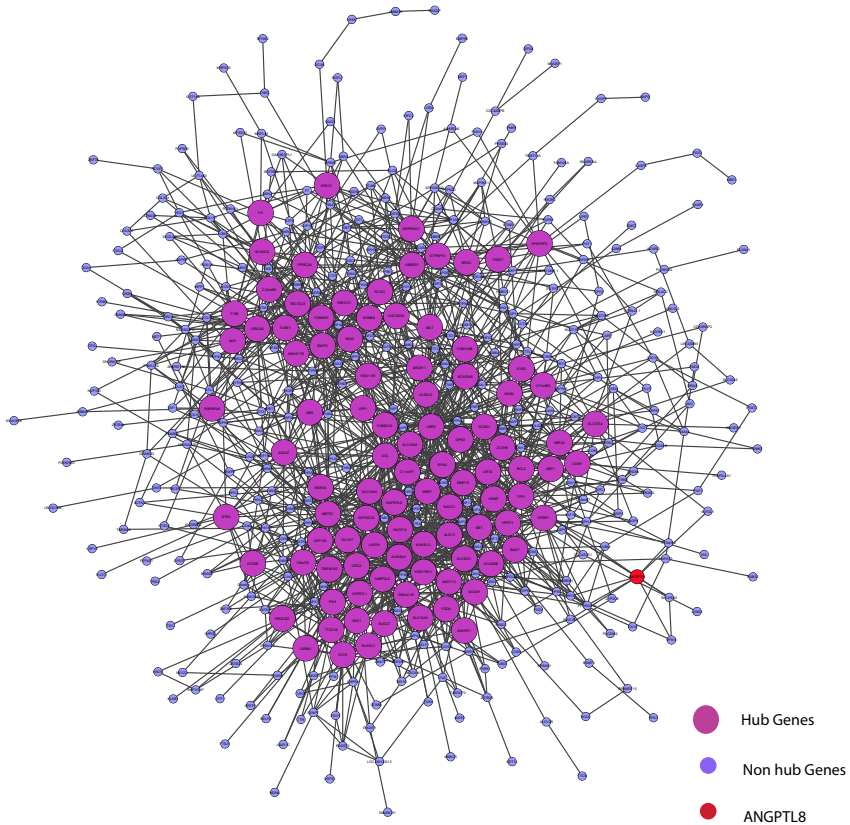

Supplement: Image_2.pdf [file Image_2.pdf]
